# Supplementary material
Source: HighWire-hosted journal article supplement (https://mct.aacrjournals.org/content/suppl/2012/05/07/1535-7163.MCT-11-0960)
Supplement: MCT_11-0960_F1-4_177K.pdf [file MCT_11-0960_F1-4_177K.pdf]

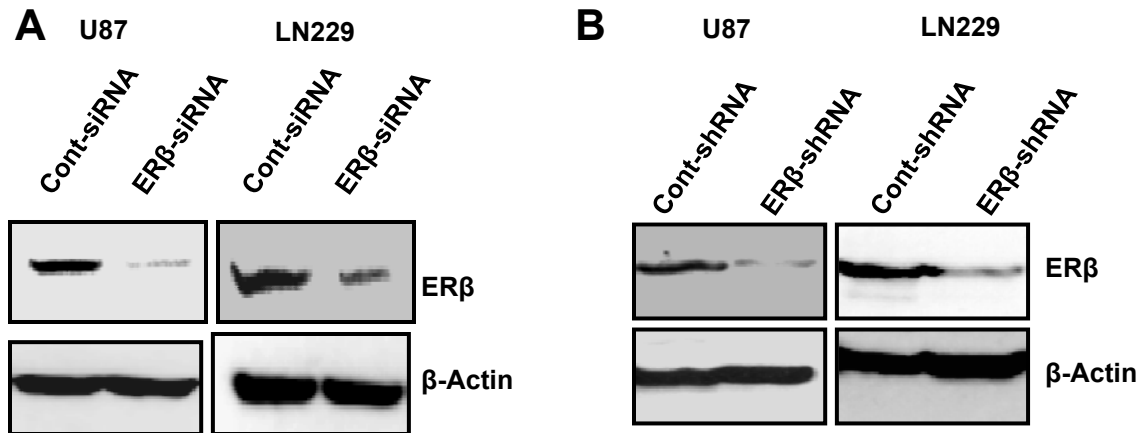

**Supplementary Figure 1:** Specificity of ERβ antibody. (A) U87 and LN229 model cells were transfected with either control or ERβ specific siRNA (cat# L-003402-00-0005, *ON-TARGETplus SMARTpool*, Fisher Scientific) and ERβ expression was analyzed after 72 h. (B) U87 and LN229 model cells were transfected with control or ERβ specific shRNA (cat# TRCN0000003325, Sigma) and ERβ expression was analyzed after 72 h.

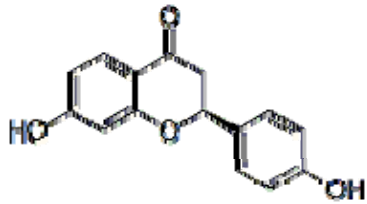

**LIQUIRITIGENIN**

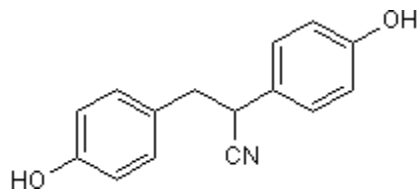

**DPN**

(2,3-*bis*(4-Hydroxyphenyl)-  
propionitrile)

**Supplementary Figure S2:** Schematic representation of structures of ER $\beta$  agonists that are used in this study

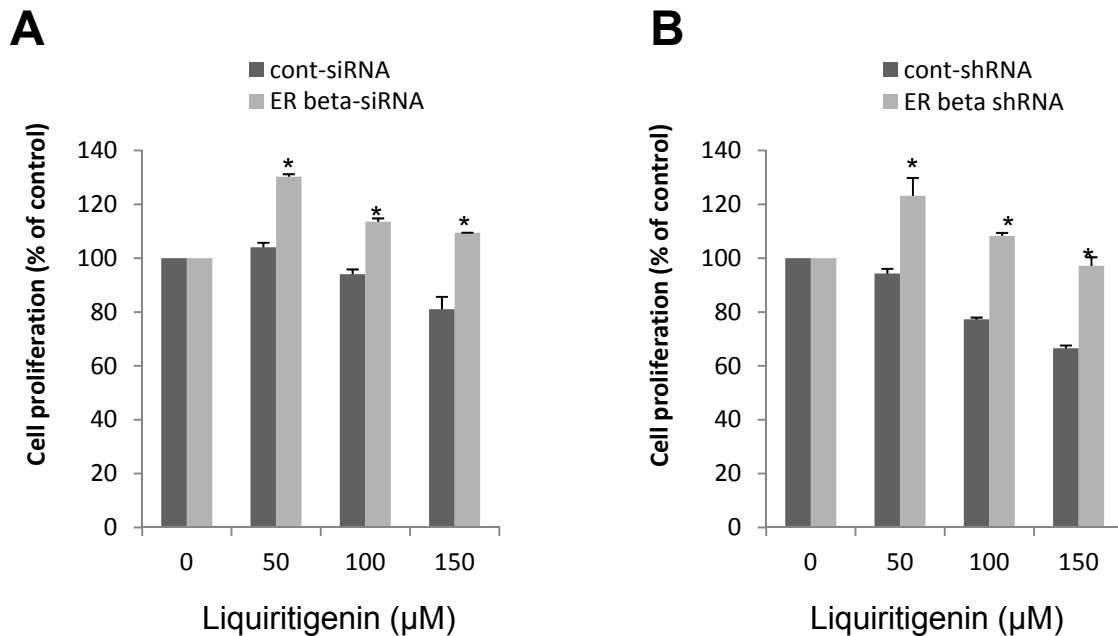

**Supplementary Figure 3:** ER $\beta$  knock down reduces the growth inhibitory effects of liquiritigenin. U87 glioma model cells were transfected with ER $\beta$  siRNA (**A**) and ER $\beta$  shRNA (**B**) respectively. Transfection of non-specific siRNA and shRNAs was used as control. After 48h of transfection, cells were treated with indicated doses of liquiritigenin and after 72 h proliferation was measured using MTT assay. Results showed that ER $\beta$  knockdown reduced liquiritigenin growth inhibitory effects. Further, increased proliferation seen in ER $\beta$  knockdown also supports its tumor suppressive role in glioma cells.

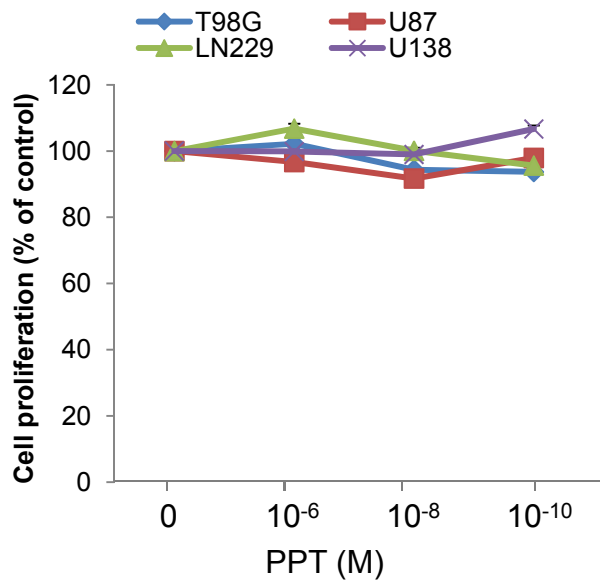

**Supplementary Figure 4.** ER $\alpha$  agonist propyl-pyrazole triol (PPT) has no effect on the proliferation of glioma cells. T98G, U87, LN229, and U138 glioma cells were treated with vehicle (0.1% DMSO) or indicated concentrations of PPT for 72 h, and proliferation was measured using MTT Assay.
